# Supplementary material for: A simple physical model for glacial cycles
Source: Copernicus journal article supplement (doi:10.5194/egusphere-2024-1842), 2024-06-25
Supplement: Supplementary file [file egusphere-2024-1842-CC3-supplement.pdf]

Dear Sergio Pérez-Montero, Dear Colleagues,

Thank you for considering my comments.

1. Unfortunately, your equation CC1.1 is also problematic because it implies that ice sheets that do not have a boundary with an ocean ( $L_{ocn} = 0$ ) have ice discharge  $q \rightarrow \infty$ .

Let us return to the basics. The total mass balance of an ice sheet can be written as

$$\frac{\partial(HS)}{\partial t} = \dot{m}S - \oint_{\gamma} \int_0^{h_g} v_g dz d\gamma$$

Here  $S \sim L^2$  is the area of an ice sheet,  $\gamma$  is the grounding line,  $h_g, v_g$  are ice thickness and normal velocity at the grounding line, correspondingly. Indeed, the parameterization of the term  $\oint_{\gamma} \int_0^{h_g} v_g dz d\gamma$  is a difficult task because at the grounding line ice thickness  $h \rightarrow 0$ , but ice slope  $\partial h / \partial x \rightarrow \infty$ . You are not the first ones who face this challenge. For example, in 1980, as a PhD student, I had to present my work to G. I. Barenblatt, and I was honored to be schooled by him about this term. I am not going to advocate here necessarily for the parameterization that was adopted as the result of this conversation (we can always discuss it off-line if needed), but if you want to continue to scale the above mass balance the same way as you did before, then your mass discharge  $q$  should be proportional to

$$q \sim \frac{L_{ocn}}{L^2} vH$$

2. I am afraid my advocacy of the vertical temperature advection has been misunderstood. Within the basal boundary layer the vertical temperature advection is indeed negligible. What I meant is that regional air temperature  $T$ , that goes into calculations of your  $h_{cond}$  is not instant  $T(t)$  but it is temperature “from the past”, i.e.,  $T = T(t - \tau)$  where  $\tau = H/\dot{s}$  is the vertical-temperature-advection timescale, i.e. time of the temperature “delivery” from the ice-sheet free surface to the upper boundary of the basal boundary layer.

Respectfully,

Mikhail Verbitsky
